# Supplementary material for: Joint use of over- and under-sampling techniques and cross-validation for the development and assessment of prediction models
Source: PubMed Central journal article supplement (PMC4634915; doi:10.1186/s12859-015-0784-9), 2015-11-04

# AUC obtained on simulated data

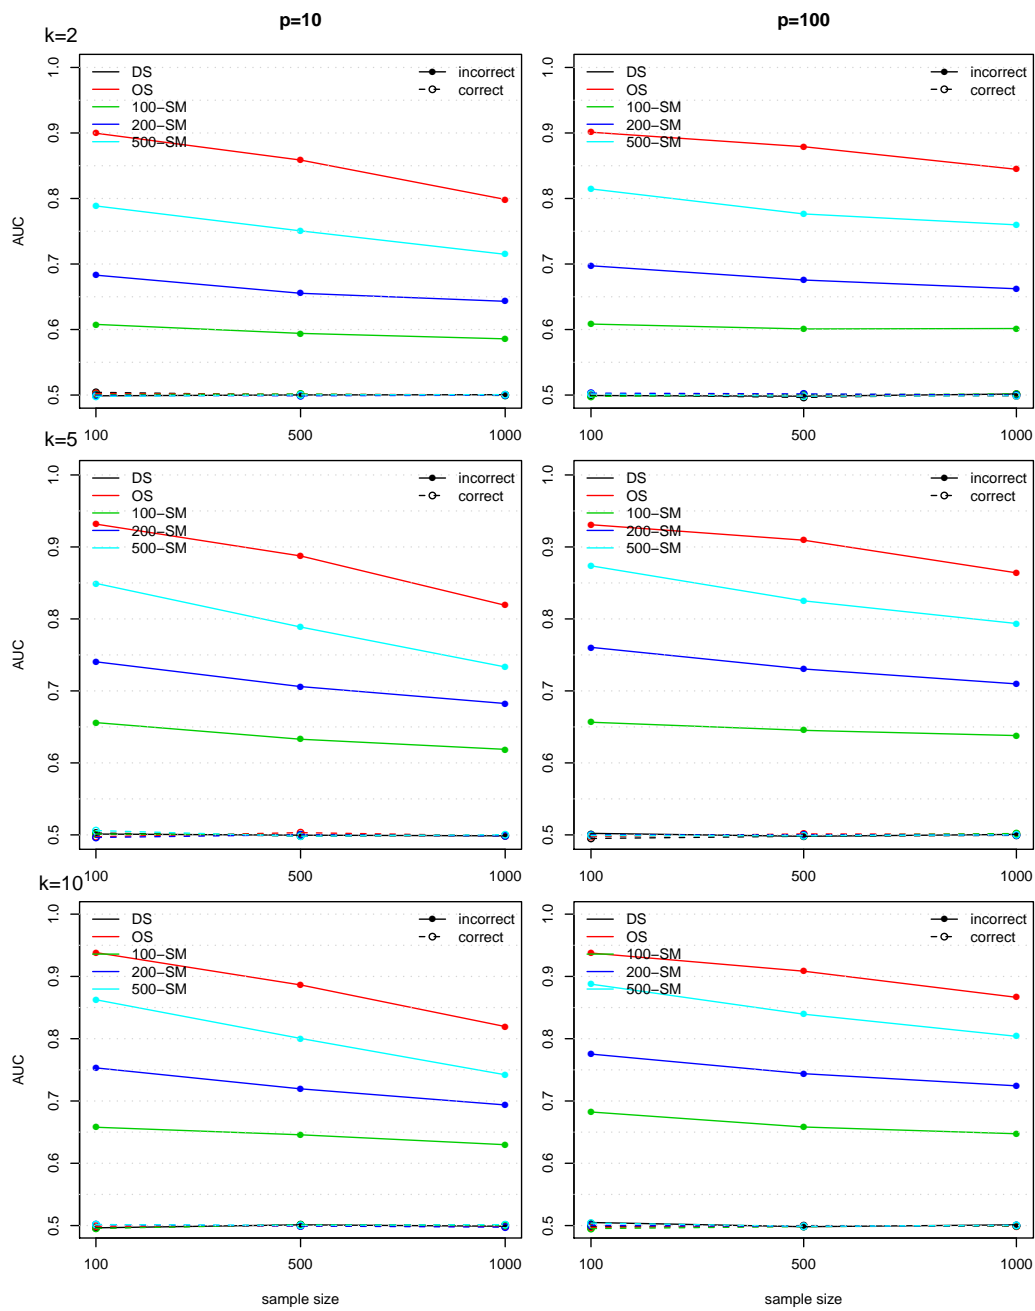

# GM obtained on simulated data

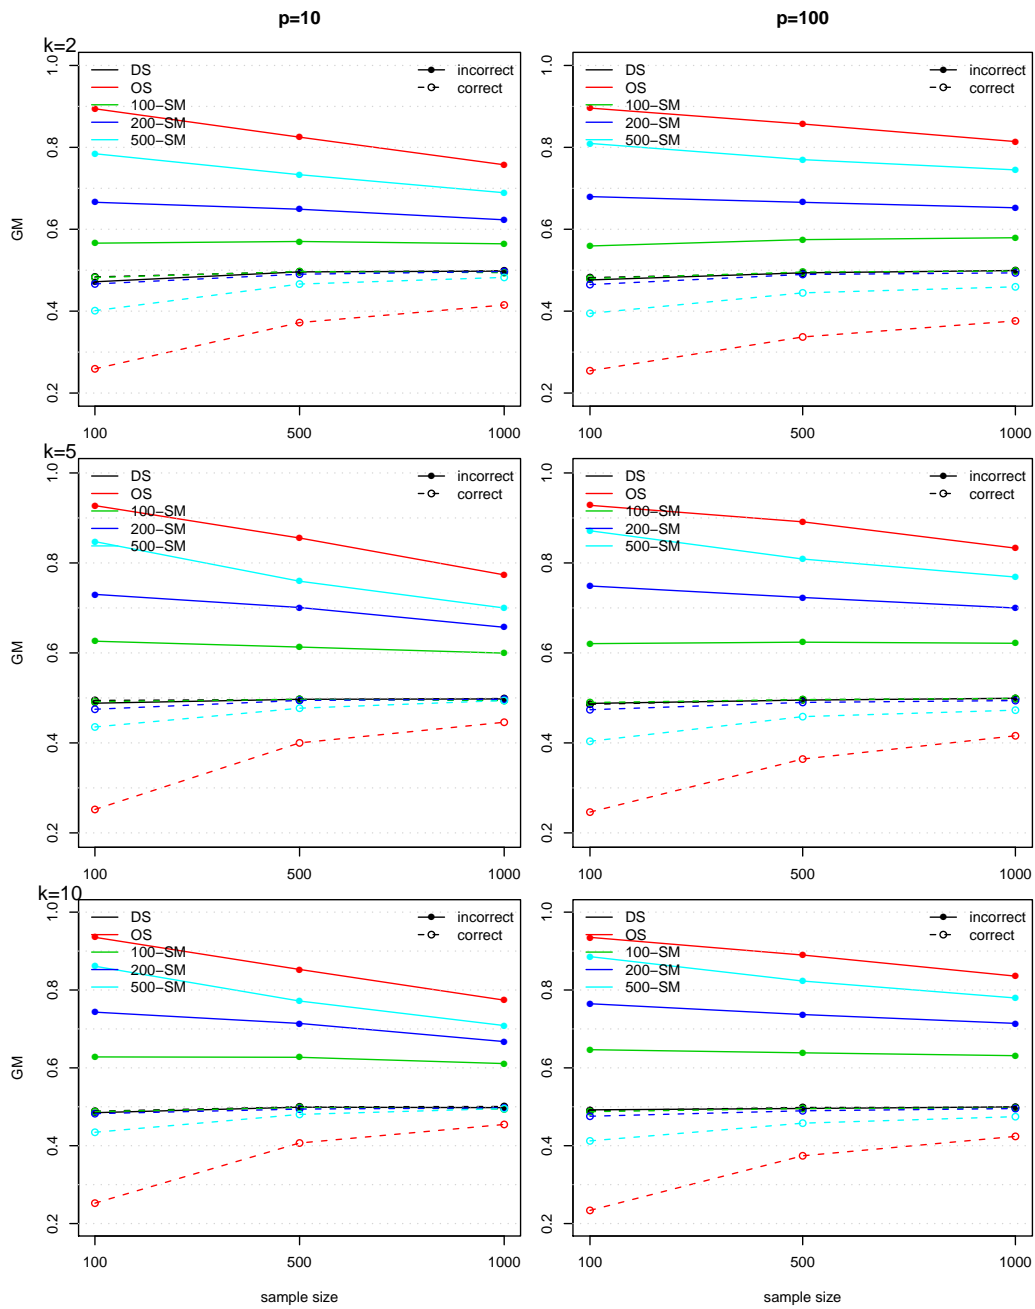

# F<sub>1</sub>-measure obtained on simulated data

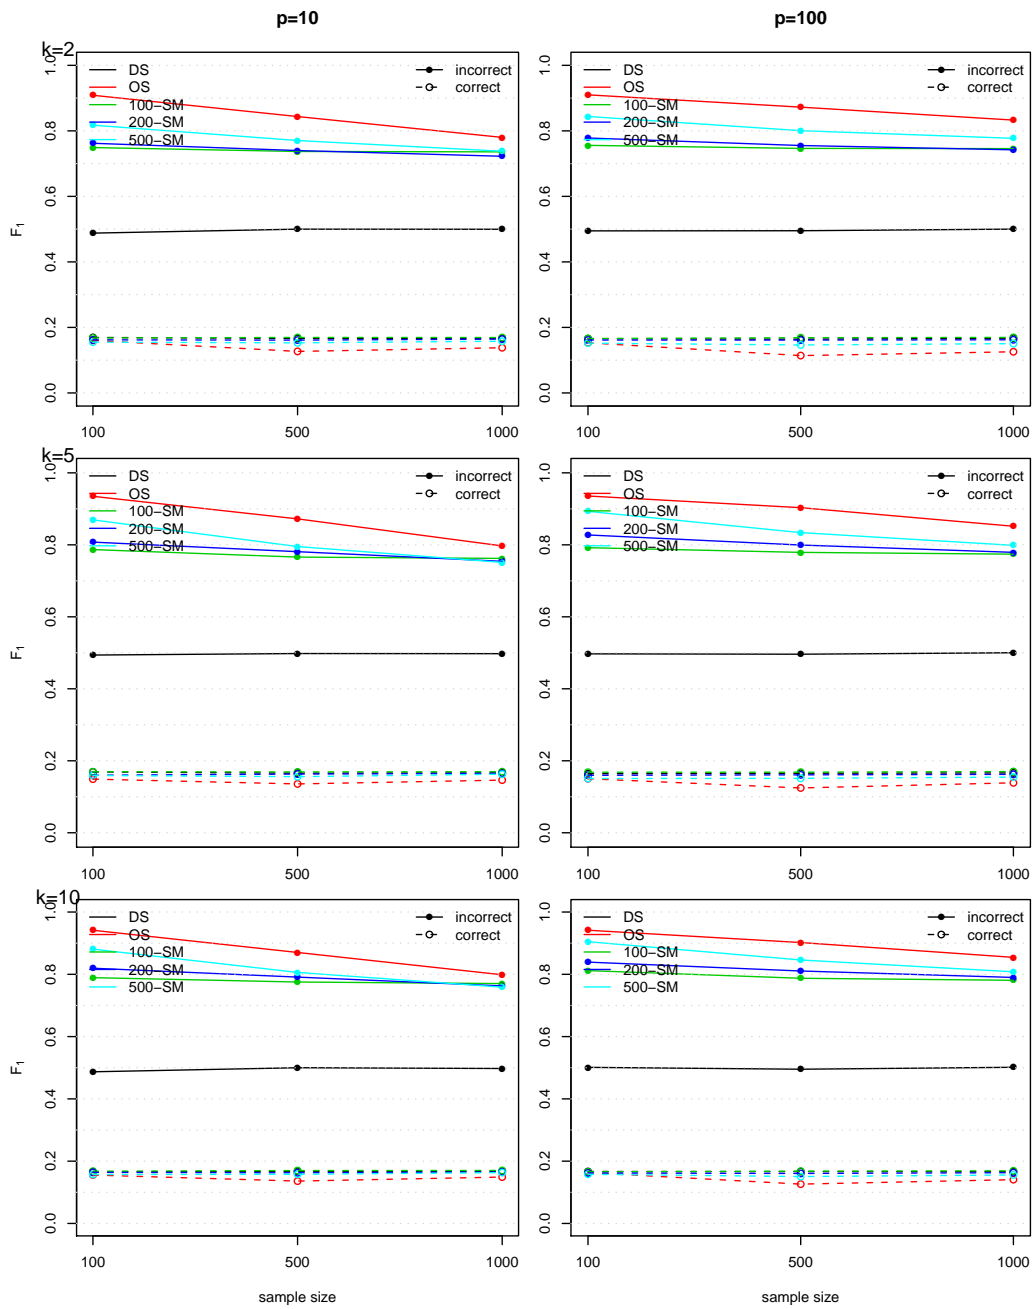

Supplement: 12859_2015_784_MOESM2_ESM.pdf [file 12859_2015_784_MOESM2_ESM.pdf]
