# Supplementary material for: Joint use of over- and under-sampling techniques and cross-validation for the development and assessment of prediction models
Source: PubMed Central journal article supplement (PMC4634915; doi:10.1186/s12859-015-0784-9), 2015-11-04
Supplement: 12859_2015_784_MOESM3_ESM.pdf [file 12859_2015_784_MOESM3_ESM.pdf]

## AUC obtained on real datasets

|                       | indian | parkinson | hepatitis | abalone | letter | lung | tae  | breast | sonar | ozone | mean        |
|-----------------------|--------|-----------|-----------|---------|--------|------|------|--------|-------|-------|-------------|
| under (incorrect)     | 0.76   | 0.81      | 0.70      | 0.68    | 0.97   | 0.71 | 0.68 | 0.96   | 0.71  | 0.70  | <b>0.77</b> |
| under (correct)       | 0.77   | 0.81      | 0.69      | 0.68    | 0.97   | 0.71 | 0.68 | 0.96   | 0.71  | 0.70  | <b>0.77</b> |
| over (incorrect)      | 0.81   | 0.94      | 0.91      | 0.69    | 0.96   | 0.82 | 0.85 | 0.98   | 0.81  | 0.93  | <b>0.87</b> |
| over (correct)        | 0.77   | 0.81      | 0.66      | 0.68    | 0.96   | 0.68 | 0.68 | 0.94   | 0.69  | 0.70  | <b>0.76</b> |
| 100-SMOTE (incorrect) | 0.80   | 0.87      | 0.79      | 0.68    | 0.97   | 0.81 | 0.79 | 0.98   | 0.85  | 0.75  | <b>0.83</b> |
| 200-SMOTE (incorrect) | 0.82   | 0.92      | 0.83      | 0.70    | 0.98   | 0.87 | 0.85 | 0.99   | 0.91  | 0.82  | <b>0.87</b> |
| 500-SMOTE (incorrect) | 0.83   | 0.96      | 0.91      | 0.76    | 0.98   | 0.95 | 0.91 | 0.99   | 0.96  | 0.89  | <b>0.91</b> |
| 100-SMOTE (correct)   | 0.74   | 0.79      | 0.69      | 0.67    | 0.97   | 0.70 | 0.67 | 0.97   | 0.69  | 0.70  | <b>0.76</b> |
| 200-SMOTE (correct)   | 0.75   | 0.81      | 0.68      | 0.68    | 0.97   | 0.71 | 0.68 | 0.96   | 0.71  | 0.71  | <b>0.77</b> |
| 500-SMOTE (correct)   | 0.76   | 0.82      | 0.68      | 0.68    | 0.97   | 0.69 | 0.68 | 0.96   | 0.72  | 0.73  | <b>0.77</b> |

Table 1: AUC obtained on various UCI datasets. The table reports AUC averaged over 500 runs of 5 fold cross-validation for the correct and the incorrect cross-validation. See the Methods section for more details.

|                       | sotiriou:er | sotiriou:grade | ivshina:er | ivshina:grade | wang:er | wang:relapse | mean        |
|-----------------------|-------------|----------------|------------|---------------|---------|--------------|-------------|
| under (incorrect)     | 0.71        | 0.59           | 0.75       | 0.73          | 0.79    | 0.55         | <b>0.69</b> |
| under (correct)       | 0.71        | 0.60           | 0.75       | 0.73          | 0.79    | 0.55         | <b>0.69</b> |
| over (incorrect)      | 0.85        | 0.74           | 0.95       | 0.93          | 0.91    | 0.75         | <b>0.85</b> |
| over (correct)        | 0.69        | 0.58           | 0.69       | 0.68          | 0.76    | 0.54         | <b>0.65</b> |
| 100-SMOTE (incorrect) | 0.83        | 0.82           | 0.82       | 0.81          | 0.86    | 0.74         | <b>0.81</b> |
| 200-SMOTE (incorrect) | 0.90        | 0.90           | 0.87       | 0.86          | 0.90    | 0.83         | <b>0.88</b> |
| 500-SMOTE (incorrect) | 0.96        | 0.97           | 0.93       | 0.92          | 0.95    | 0.91         | <b>0.94</b> |
| 100-SMOTE (correct)   | 0.70        | 0.61           | 0.74       | 0.72          | 0.78    | 0.53         | <b>0.68</b> |
| 200-SMOTE (correct)   | 0.71        | 0.60           | 0.74       | 0.71          | 0.78    | 0.54         | <b>0.68</b> |
| 500-SMOTE (correct)   | 0.70        | 0.59           | 0.70       | 0.67          | 0.79    | 0.54         | <b>0.67</b> |

Table 2: AUC obtained on various gene expression microarray datasets. The table reports AUC averaged over 500 runs of 5 fold cross-validation for the correct and the incorrect cross-validation. See the Methods section for more details.

## GM obtained on real datasets

|                       | indian | parkinson | hepatitis | abalone | letter | lung | tae  | breast | sonar | ozone | mean        |
|-----------------------|--------|-----------|-----------|---------|--------|------|------|--------|-------|-------|-------------|
| under (incorrect)     | 0.73   | 0.81      | 0.69      | 0.64    | 0.95   | 0.71 | 0.67 | 0.96   | 0.71  | 0.73  | <b>0.76</b> |
| under (correct)       | 0.73   | 0.81      | 0.69      | 0.65    | 0.95   | 0.71 | 0.67 | 0.96   | 0.71  | 0.73  | <b>0.76</b> |
| over (incorrect)      | 0.77   | 0.92      | 0.90      | 0.65    | 0.94   | 0.80 | 0.81 | 0.98   | 0.81  | 0.92  | <b>0.85</b> |
| over (correct)        | 0.73   | 0.81      | 0.65      | 0.65    | 0.94   | 0.68 | 0.65 | 0.94   | 0.70  | 0.74  | <b>0.75</b> |
| 100-SMOTE (incorrect) | 0.75   | 0.86      | 0.78      | 0.59    | 0.95   | 0.80 | 0.78 | 0.98   | 0.85  | 0.77  | <b>0.81</b> |
| 200-SMOTE (incorrect) | 0.78   | 0.92      | 0.84      | 0.63    | 0.96   | 0.86 | 0.83 | 0.99   | 0.90  | 0.82  | <b>0.85</b> |
| 500-SMOTE (incorrect) | 0.80   | 0.95      | 0.90      | 0.70    | 0.96   | 0.95 | 0.87 | 0.99   | 0.94  | 0.87  | <b>0.89</b> |
| 100-SMOTE (correct)   | 0.69   | 0.79      | 0.69      | 0.59    | 0.94   | 0.70 | 0.66 | 0.96   | 0.69  | 0.72  | <b>0.74</b> |
| 200-SMOTE (correct)   | 0.72   | 0.81      | 0.69      | 0.62    | 0.95   | 0.70 | 0.66 | 0.96   | 0.72  | 0.72  | <b>0.76</b> |
| 500-SMOTE (correct)   | 0.73   | 0.82      | 0.66      | 0.64    | 0.95   | 0.69 | 0.64 | 0.96   | 0.72  | 0.71  | <b>0.75</b> |

Table 3: GM obtained on various UCI datasets. The table reports GM averaged over 500 runs of 5 fold cross-validation for the correct and the incorrect cross-validation. See the Methods section for more details.

|                       | sotiriou:er | sotiriou:grade | ivshina:er | ivshina:grade | wang:er | wang:relapse | mean        |
|-----------------------|-------------|----------------|------------|---------------|---------|--------------|-------------|
| under (incorrect)     | 0.71        | 0.59           | 0.75       | 0.73          | 0.79    | 0.55         | <b>0.68</b> |
| under (correct)       | 0.71        | 0.59           | 0.75       | 0.73          | 0.79    | 0.55         | <b>0.69</b> |
| over (incorrect)      | 0.85        | 0.74           | 0.94       | 0.92          | 0.91    | 0.74         | <b>0.85</b> |
| over (correct)        | 0.67        | 0.56           | 0.65       | 0.66          | 0.78    | 0.52         | <b>0.64</b> |
| 100-SMOTE (incorrect) | 0.83        | 0.81           | 0.82       | 0.81          | 0.86    | 0.74         | <b>0.81</b> |
| 200-SMOTE (incorrect) | 0.90        | 0.90           | 0.87       | 0.86          | 0.90    | 0.82         | <b>0.88</b> |
| 500-SMOTE (incorrect) | 0.96        | 0.96           | 0.93       | 0.92          | 0.94    | 0.89         | <b>0.93</b> |
| 100-SMOTE (correct)   | 0.69        | 0.60           | 0.74       | 0.71          | 0.78    | 0.53         | <b>0.68</b> |
| 200-SMOTE (correct)   | 0.71        | 0.60           | 0.73       | 0.71          | 0.79    | 0.54         | <b>0.68</b> |
| 500-SMOTE (correct)   | 0.71        | 0.60           | 0.71       | 0.69          | 0.80    | 0.54         | <b>0.67</b> |

Table 4: GM obtained on various gene expression microarray datasets. The table reports GM averaged over 500 runs of 5 fold cross-validation for the correct and the incorrect cross-validation. See the Methods section for more details.

## F<sub>1</sub>-measure obtained on real datasets

|                       | indian | parkinson | hepatitis | abalone | letter | lung | tae  | breast | sonar | ozone | mean        |
|-----------------------|--------|-----------|-----------|---------|--------|------|------|--------|-------|-------|-------------|
| under (incorrect)     | 0.73   | 0.81      | 0.70      | 0.70    | 0.95   | 0.73 | 0.68 | 0.96   | 0.72  | 0.73  | <b>0.77</b> |
| under (correct)       | 0.77   | 0.67      | 0.48      | 0.56    | 0.62   | 0.58 | 0.57 | 0.90   | 0.73  | 0.84  | <b>0.67</b> |
| over (incorrect)      | 0.77   | 0.93      | 0.91      | 0.71    | 0.94   | 0.84 | 0.82 | 0.98   | 0.80  | 0.92  | <b>0.86</b> |
| over (correct)        | 0.78   | 0.72      | 0.49      | 0.56    | 0.62   | 0.54 | 0.54 | 0.89   | 0.74  | 0.93  | <b>0.68</b> |
| 100-SMOTE (incorrect) | 0.68   | 0.92      | 0.86      | 0.83    | 0.97   | 0.88 | 0.86 | 0.99   | 0.81  | 0.71  | <b>0.85</b> |
| 200-SMOTE (incorrect) | 0.74   | 0.94      | 0.87      | 0.79    | 0.97   | 0.90 | 0.87 | 0.99   | 0.88  | 0.78  | <b>0.87</b> |
| 500-SMOTE (incorrect) | 0.78   | 0.96      | 0.91      | 0.77    | 0.97   | 0.96 | 0.88 | 0.99   | 0.94  | 0.86  | <b>0.90</b> |
| 100-SMOTE (correct)   | 0.70   | 0.64      | 0.48      | 0.56    | 0.53   | 0.57 | 0.57 | 0.91   | 0.68  | 0.81  | <b>0.65</b> |
| 200-SMOTE (correct)   | 0.74   | 0.68      | 0.49      | 0.56    | 0.59   | 0.58 | 0.56 | 0.92   | 0.72  | 0.86  | <b>0.67</b> |
| 500-SMOTE (correct)   | 0.77   | 0.71      | 0.48      | 0.54    | 0.64   | 0.56 | 0.52 | 0.92   | 0.73  | 0.90  | <b>0.68</b> |

Table 5: F<sub>1</sub>-measure obtained on various UCI datasets. The table reports F<sub>1</sub>-measure averaged over 500 runs of 5 fold cross-validation for the correct and the incorrect cross-validation. See the Methods section for more details.

|                       | sotiriou:er | sotiriou:grade | ivshina:er | ivshina:grade | wang:er | wang:relapse | me   |
|-----------------------|-------------|----------------|------------|---------------|---------|--------------|------|
| under (incorrect)     | 0.71        | 0.59           | 0.75       | 0.73          | 0.79    | 0.55         | 0.69 |
| under (correct)       | 0.76        | 0.62           | 0.45       | 0.51          | 0.67    | 0.47         | 0.58 |
| over (incorrect)      | 0.84        | 0.72           | 0.95       | 0.93          | 0.91    | 0.76         | 0.85 |
| over (correct)        | 0.80        | 0.65           | 0.46       | 0.50          | 0.69    | 0.41         | 0.58 |
| 100-SMOTE (incorrect) | 0.77        | 0.75           | 0.89       | 0.88          | 0.91    | 0.83         | 0.84 |
| 200-SMOTE (incorrect) | 0.88        | 0.87           | 0.90       | 0.90          | 0.92    | 0.86         | 0.89 |
| 500-SMOTE (incorrect) | 0.95        | 0.96           | 0.93       | 0.92          | 0.95    | 0.89         | 0.93 |
| 100-SMOTE (correct)   | 0.73        | 0.59           | 0.43       | 0.48          | 0.65    | 0.49         | 0.56 |
| 200-SMOTE (correct)   | 0.77        | 0.61           | 0.46       | 0.50          | 0.68    | 0.47         | 0.58 |
| 500-SMOTE (correct)   | 0.78        | 0.61           | 0.47       | 0.49          | 0.70    | 0.46         | 0.58 |

Table 6: F<sub>1</sub>-measure obtained on various gene expression microarray datasets. The table reports F<sub>1</sub>-measure averaged over 500 runs of 5 fold cross-validation for the correct and the incorrect cross-validation. See the Methods section for more details.
